# Supplementary material for: Association Between Pre-Treatment HPV Genotype and Survival in Cervical Cancer: Insights From a Prospective Cohort
Source: Research Square preprint supplement (doi:10.21203/rs.3.rs-6770268/v1), 2025-06-17
Supplement: Supplementary file 1 [file 619d5366290b348df2374cef.docx]

| HPV-UNRELATED CC (n=7) | | | | | | | | | HPV-RELATED CC (n=77) | | | | | | | | |
| --- | --- | --- | --- | --- | --- | --- | --- | --- | --- | --- | --- | --- | --- | --- | --- | --- | --- |
| *SOCIODEMOGRAPHIC VARIABLES* | *Me* | *IQR* | | | | | *R* | | *Me* | | *IQR* | | | | | *R* | *p* |
| Age at diagnosis of CC, years | 52 | 19 | | | | | 45-73 | | 44 | | 17 | | | | | 23-80 | 0.037 |
| **QUALITATIVE CLINICAL VARIABLES** | *n* | | | *%* | | | | *n* | | | | | | *%* | | | *p* |
| FIGO stage  - IA1  - IA2  - IB1  - IIA1  - IIA2  - IB2  - IIB  - IIIA  - IIIB  - IIIC  - IVA  - IVB | 0  0  0  0  0  4  2  1  0  0  0  0 | | | 0  0  0  0  0  57.14  28.57  14.29  0  0  0  0 | | | | | 25  3  20  3  1  2  9  1  3  0  5  5 | | | | 32.47  3.90  25.97  3.90  1.30  2.60  11.68  1.30  3.90  0.00  6.49  6.49 | | | | 0.043 |
| Degree of tumor differentiation  - 1  - 2  - 3  - NA | 2  0  4  1 | | | 28.57  0.00  57.14  14.29 | | | | | 44  9  20  4 | | | | 57.14  11.70  25.97  5.19 | | | | 0.107 |
| Histological type  - Squamous  - Adenocarcinoma  - Clear cell adenocarcinoma  - Adenosquamous  - Neuroendocrine | 3  2  1  0  1 | | | 42.86  28.57  14.28  0.00  14.29 | | | | | 54  20  0  2  1 | | | | 70.13  25.97  0.00  2.60  1.30 | | | | 0.077 |
| LVI  - Negative  - Positive | 7  0 | | | 100  0.00 | | | | | 65  12 | | | | 84.42  15.58 | | | | 0.268 |
| Stromal invasion depth  - <1/3  - 1/3-<2/3  - 2/3  - >2/3  - 3/3  - NA | 0  0  0  7  0  0 | | | 0.00  0.00  0.00  100  0.00  0.00 | | | | | 31  5  9  26  1  5 | | | | 40.26  6.49  11.69  33.77  1.30  6.49 | | | | 0.028 |
| PI  - Negative  - Positive  - NA | 4  3  0 | | | 57.14  42.86  0 | | | | | 59  17  1 | | | | 76.62  22.08  1.30 | | | | 0.232 |
| **QUANTITATIVE CLINICAL VARIABLES** | *Me* | *IQR* | | | | | *R* | | *Me* | | *IQR* | | | | | *R* | *p* |
| MTD, mm | 55 | 15 | | | | | 33-100 | | 28 | | 48 | | | | | 1-111 | 0.008 |
| MPLNs | 0 | 0 | | | | | 0 | | 0 | | 0 | | | | | 0-2 | - |
| MPALNs | 0 | 0 | | | | | 0 | | 0 | | 0 | | | | | 0 | - |
| NON-HPV-16 CC (n=22) | | | | | | | | | HPV 16-RELATED CC (n=30) | | | | | | | | |
| *SOCIODEMOGRAPHIC VARIABLES* | *Me* | *IQR* | | | | | *R* | | *Me* | | *IQR* | | | | | *R* | *p* |
| Age at diagnosis of CC, years | 44 | 14.75 | | | | | 29-69 | | 41 | | 11.25 | | | | | 27.70 | 0.188 |
| **QUALITATIVE CLINICAL VARIABLES** | n | | % | | | | | N | | | | % | | | | | *p* |
| FIGO stage  - IA1  - IA2  - IB1  - IIA1  - IIA2  - IB2  - IIB  - IIIA  - IIIB  - IIIC  - IVA  - IVB | 13  1  5  0  0  0  2  0  0  0  1  0 | | 59.09  4.55  22.73  0.00  0.00  0.00  9.09  0.00  0.00  0.00  4.54  0.00 | | | | | | 11  2  11  2  0  1  2  0  1  0  0  0 | | | | 36.67  6.67  36.67  6.67  0.00  3.33  6.67  0.00  3.33  0.00  0.00  0.00 | | | | 0.181 |
| Histological type  - Squamous  - Adenocarcinoma  - Clear cell adenocarcinoma  - Adenosquamous  - Neuroendocrine | 16  5  0  1  0 | | | 72.73  22.73  0.00  4.54  0.00 | | | | | 26  3  0  1  0 | | | | 86.67  10  0.00  3.33  0.00 | | | | 0.229 |
| Degree of tumor differentiation  - 1  - 2  - 3  - NA | 16  2  4  0 | | | 72.73  9.09  18.18  0 | | | | | 17  5  7  1 | | | | 56.67  16.67  23.33  3.33 | | | | 0.351 |
| LVI  - Negative  - Positive | 18  4 | | | 81.82  18.18 | | | | | 24  6 | | | | 80  20 | | | | 0.881 |
| Stromal invasion depth  - <1/3  - 1/3-<2/3  - 2/3  - >2/3  - 3/3  - NA | 14  1  4  0  1  2 | | | 63.64  4.55  18.18  0.00  4.55  9.08 | | | | | 14  5  5  4  0  2 | | | | 46.67  16.67  16.67  13.33  0.00  6.6 | | | | 0.231 |
| PI  - Negative  - Positive | 19  3 | | | 83.36  16.64 | | | | | 28  2 | | | | 93.33  6.67 | | | | 0.415 |
| **QUALITATIVE CLINICAL VARIABLES** | N | | | % | | | | | n | | | | % | | | | *p* |
| MTD, mm | 23.5 | 26.25 | | | | | 2.3-65 | | 20 | | 15 | | | | | 1-55 | 0.859 |
| MPLNs | 0 | 0 | | | | | 0 | | 0 | | 0 | | | | | 0-2 | - |
| MPALNs | 0 | 0 | | | | | 0 | | 0 | | 0 | | | | | 0 | - |
| NON-HPV-18 CC (n=45) | | | | | | | | | HPV 18-RELATED CC (n=7) | | | | | | | | |
| *SOCIODEMOGRAPHIC VARIABLES* | *Me* | *IQR* | | | | | *R* | | *Me* | | *IQR* | | | | | *R* | P |
| Age at diagnosis of CC, years | 42 | 15 | | | | | 27-70 | | 40 | | 6 | | | | | 36-69 | 0.957 |
| **QUALITATIVE CLINICAL VARIABLES** | n | | | | | % | | | n | | | | % | | | | *p* |
| FIGO stage  - IA1  - IA2  - IB1  - IIA1  - IIA2  - IB2  - IIB  - IIIA  - IIIB  - IIIC  - IVA  - IVB | 19  3  14  2  0  1  4  0  1  0  0  1 | | | | | 42.22  6.67  31.11  4.44  0.00  2.22  8.89  0.00  2.22  0.00  0.00  2.22 | | | 5  0  2  0  0  0  0  0  0  0  0  0 | | | | 71.43  0.00  28.57  0.00  0.00  0.00  0.00  0.00  0.00  0.00  0.00  0.00 | | | | 0.139 |
| Histological type  - Squamous  - Adenocarcinoma  - Clear cell adenocarcinoma  - Adenosquamous  - Neuroendocrine | 40  4  0  1  0 | | | | | 88.89  8.89  0.00  2.22  0.00 | | | 2  4  0  1  0 | | | | 28.57  57.14  0.00  14.29  0.00 | | | | <0.0001 |
| Degree of tumor differentiation  - 1  - 2  - 3  - NA | 28  6  10  1 | | | | | 62.22  13.33  22.22  2.23 | | | 5  1  1  0 | | | | 71.42  14.29  14.29  0.00 | | | | 0.663 |
| LVI  - Negative  - Positive | 36  9 | | | | | 80  20 | | | 6  1 | | | | 85.71  14.29 | | | | 0.739 |
| Stromal invasion depth  - <1/3  - 1/3-<2/3  - 2/3  - >2/3  - 3/3  - NA | 23  6  7  4  1  4 | | | | | 51.11  13.33  15.56  8.89  2.22  8.89 | | | 5  0  0  2  0  0 | | | | 71.43  0.00  0.00  28.57  0.00  0.00 | | | | 0.501 |
| PI  - Negative  - Positive | 40  5 | | | | | 88.89  11.11 | | | 7  0 | | | | 100  0.00 | | | | 0.372 |
| MTD, mm | 20 | 20 | | | | | 1-65 | | 5.5 | | 8.925 | | | | | 2.3-35 | 0.217 |
| MPLNs | 0 | 0 | | | | | 0 | | 0 | | 0 | | | | | 0-2 | - |
| MPALNs | 0 | 0 | | | | | 0 | | 0 | | 0 | | | | | 0 | - |
| SINGLE-HR-HPV CC (n=10) | | | | | | | | | MULTIPLE-HR-HPV CC (n=46) | | | | | | | | *p* |
| *SOCIODEMOGRAPHIC VARIABLES* | *Me* | *IQR* | | | | | *R* | | *Me* | | *IQR* | | | | | *R* | *p* |
| Age at diagnosis of CC, years | 39 | 9.5 | | | | | 27-51 | | 43 | | 15 | | | | | 23-75 | 0.101 |
| **QUALITATIVE CLINICAL VARIABLES** | n | | | | % | | | | | n | | | | | % | | *p* |
| FIGO stage  - IA1  - IA2  - IB1  - IIA1  - IIA2  - IB2  - IIB  - IIIA  - IIIB  - IIIC  - IVA  - IVB | 5  1  4  0  0  0  0  0  0  0  0  0 | | | | | 50.00  10.00  40.00  0.00  0.00  0.00  0.00  0.00  0.00  0.00  0.00  0.00 | | | 19  2  12  2  1  1  6  0  1  0  1  1 | | | | 41.30  4.35  26.09  4.35  2.17  2.17  13.04  0.00  2.17  0.00  2.17  2.17 | | | | 0.223 |
| Histological type  - Squamous  - Adenocarcinoma  - Clear cell adenocarcinoma  - Adenosquamous  - Neuroendocrine | 7  2  0  1  0 | | | | | 70.00  20.00  0.00  10.00  0.00 | | | 36  9  0  1  0 | | | | 78.26  19.57  0.00  2.17  0.00 | | | | 0.522 |
| Degree of tumor differentiation  - 1  - 2  - 3  - NA | 7  3  0  0 | | | | | 70.00  30.00  0.00  0.00 | | | 28  4  13  1 | | | | 60.87  8.70  28.26  2.17 | | | | 0.350 |
| LVI  - Negative  - Positive | 9  1 | | | | | 90.00  10.00 | | | 37  9 | | | | 80.43  19.57 | | | | 0.488 |
| Stromal invasion depth  - <1/3  - 1/3-<2/3  - 2/3  - >2/3  - 3/3  - NA | 6  2  1  0  0  1 | | | | | 60.00  20.00  10.00  0.00  0.00  10.00 | | | 23  4  11  4  1  3 | | | | 50.00  8.70  23.91  8.70  2.17  6.52 | | | | 0.266 |
| PI  - Negative  - Positive | 10  0 | | | | | 100.00  0.00 | | | 38  8 | | | | 82.61  17.39 | | | | 0.163 |
| MTD, mm | 10 | 17 | | | | | 5-35 | | 24.5 | | 19.5 | | | | | 1-65 | 0.393 |
| MPLNs | 0 | 0 | | | | | 0 | | 0 | | 0 | | | | | 0-2 | - |
| MPALNs | 0 | 0 | | | | | 0 | | 0 | | 0 | | | | | 0 | - |

Table S1 Comparison of the demographic and clinical characteristics of the patients with CC regarding HPV status and genotyping

aAbbreviations

CC, cervical cancer; FIGO, International Federation of Gynecology and Obstetrics; HPV, human papillomavirus; HR, high-risk; IQR, interquartile range; LVI, lymphovascular invasion; Me, median; MPALN, metastatic para-aortic lymph node; MPLN, metastatic pelvic lymph node; MTD, maximum tumor diameter; n, sample size; NA, not available; PI, parametrial invasion; R, range
