# Supplementary material for: Association Between Pre-Treatment HPV Genotype and Survival in Cervical Cancer: Insights From a Prospective Cohort
Source: Research Square preprint supplement (doi:10.21203/rs.3.rs-6770268/v1), 2025-06-17
Supplement: Supplementary file 2 [file 9260d1982108849d94a6fe8c.docx]

| VARIABLES | HPV-POSITIVE *VS.* HPV-NEGATIVE  (*p*) | HPV 16 *VS.* OTHER-THAN-16  (*p*) | HPV 18 *VS.* OTHER-THAN-18  (*p*) | SINGLE HPV *VS.* MULTIPLE HPV  (*p*) |
| --- | --- | --- | --- | --- |
| Age at diagnosis (years) | 44 *vs.* 52, 0.037 | 0.188 | 0.957 | 46 *vs.* 39, 0.053 |
| MTD (mm) | 28 *vs.* 55, 0.008 | 0.859 | 0.217 | 0.767 |
| SI | 1/3 *vs.* 2/3, 0.028 | 0.231 | 0.501 | 0.731 |
| FIGO stage | IB2 *vs.* IB1, 0.043 | 0.181 | 0.139 | 0.658 |
| Degree of tumor differentiation | 0.107 | 0.351 | 0.663 | 0.791 |
| Histological type | 0.077 | 0.229 | Adenocarcinoma *vs.* squamous, 0.0002 | 0.525 |
| LVI | 0.268 | 0.881 | 0.739 | 0.781 |
| PI | 0.232 | 0.415 | 0.372 | 0.163 |

Table S2 Comparison of clinicopathological variables among VPH groups

aAbbreviations

FIGO, International Federation of Gynecology and Obstetrics; HPV, human papillomavirus; LVI, lymphovascular invasion; MTD, maximum tumor diameter; PI, parametrial invasion; SI, stromal invasion
