# Supplementary material for: Association Between Pre-Treatment HPV Genotype and Survival in Cervical Cancer: Insights From a Prospective Cohort
Source: Research Square preprint supplement (doi:10.21203/rs.3.rs-6770268/v1), 2025-06-17
Supplement: Supplementary file 3 [file 93e8ffb27693027b003b2053.docx]

| HPV GENOTYPING | SQUAMOUS  (n) | ADENOCARCINOMA  (n) | ADENOSQUAMOUS  (n) | CLEAR CELL ADENOCARCINOMA  (n) | NEUROENDOCRINE  (n) |
| --- | --- | --- | --- | --- | --- |
| Negative | 3 | 2 | 0 | 1 | 1 |
| Single HR | 7 | 2 | 1 | 0 | 0 |
| Multiple HR | 7 | 2 | 1 | 0 | 0 |
| 16 | 26 | 3 | 1 | 0 | 0 |
| 18 | 2 | 4 | 1 | 0 | 0 |
| 31 | 6 | 1 | 0 | 0 | 0 |
| 33 | 3 | 0 | 0 | 0 | 0 |
| 39 | 1 | 0 | 0 | 0 | 0 |
| 73 | 1 | 0 | 0 | 0 | 0 |
| 16 + 31 | 1 | 0 | 0 | 0 | 0 |
| 16 + 39 | 1 | 0 | 0 | 0 | 0 |
| 16 + 52 | 0 | 0 | 1 | 0 | 0 |
| 16 + 66 | 0 | 1 | 0 | 0 | 0 |
| 18 + 33 | 1 | 0 | 0 | 0 | 0 |
| 18 + 58 | 0 | 1 | 0 | 0 | 0 |
| 16 + 68 + 6 | 1 | 0 | 0 | 0 | 0 |
| 16 + 58 + 66 + 6 | 1 | 0 | 0 | 0 | 0 |
| 16 + 6 + 44 + 45 | 1 | 0 | 0 | 0 | 0 |
| 31 + 35 + 53 + 58 + 62 + 81 | 1 | 0 | 0 | 0 | 0 |
| 56 + 58 + 54 | 1 | 0 | 0 | 0 | 0 |

Table S3 HPV genotypes regarding histological types of CC

aAbbreviations

HR, high-risk; n, sample size
